# Supplementary material for: Concentration-Dependent Activity of Pazufloxacin against Pseudomonas aeruginosa: An In Vivo Pharmacokinetic/Pharmacodynamic Study
Source: MDPI journal article supplement (doi:10.3390/antibiotics11070982), 2022-07-21
Supplement: s1 [file s1]

**Table S1 Accuracy and precision of quantification of PZFX**

|           | PZFX concentration (µg/mL) | 0.1   | 1.0   | 10    |
|-----------|----------------------------|-------|-------|-------|
| Inter-day | Accuracy (%)               | -9.95 | -7.29 | 0.07  |
|           | Precision (CV, %)          | 3.59  | 4.73  | 0.04  |
| Intra-day | Accuracy (%)               | 11.19 | 12.66 | -0.13 |
|           | Precision (CV, %)          | 7.77  | 8.59  | 9.91  |
